# Supplementary material for: The Use of Botulinum Toxin A in the Management of Trigeminal Neuralgia: a Systematic Literature Review
Source: PubMed Central journal article supplement — J Oral Maxillofac Res. 2020 Jun 30;11(2):e2. doi: 10.5037/jomr.2020.11202 (PMC7393930; doi:10.5037/jomr.2020.11202), 2020-06-30
Supplement: jomr-11-e2-a001.pdf [file jomr-11-e2-a001.pdf]

**Appendix 1.** Protocol for systematic review according to PRISMA-P

|                                    |                                                                                                                                                                                                                                                                                                                                                                                                                   |
|------------------------------------|-------------------------------------------------------------------------------------------------------------------------------------------------------------------------------------------------------------------------------------------------------------------------------------------------------------------------------------------------------------------------------------------------------------------|
| <b>Title</b>                       | The Use of Botulinum Toxin A in the Management of Trigeminal Neuralgia: a Systematic Literature Review                                                                                                                                                                                                                                                                                                            |
| <b>Introduction</b>                |                                                                                                                                                                                                                                                                                                                                                                                                                   |
| <b>Aim</b>                         | The purpose of this article is to systematically review the use, efficacy, differences between BT-A doses and side effects of BT-A therapy in patients with TN                                                                                                                                                                                                                                                    |
| <b>Tasks</b>                       | To evaluate the efficacy and side effects of BT-A in the patients with TN.<br>To find differences between BT-A doses in the patients with TN.<br>To discover the length of effect of BT-A therapy in the patients with TN.                                                                                                                                                                                        |
| <b>Methods</b>                     |                                                                                                                                                                                                                                                                                                                                                                                                                   |
| <b>Eligibility criteria</b>        | PICOS:<br>P - Patients: individuals with trigeminal neuralgia;<br>I - Intervention: Botulinum toxin A;<br>C- Comparison: saline (NaCL) as a placebo;<br>O - Outcome: presence or absence or reduction of pain;<br>S - Study design: randomized, double-blind, placebo controlled trials                                                                                                                           |
|                                    | Inclusion criteria:<br>- Studies of patients with trigeminal neuralgia<br>- Studies of comparison between BT-A and saline<br>- Randomized, double-blind, placebo controlled trials<br>- Studies between Jan 2010 - Feb 2020<br>- Studies with the amount of more than 20 individuals<br>- Studies in English language<br>- Studies in which VAS was present<br>- Studies on humans<br>- Full-text article studies |
|                                    | Exclusion criteria:<br>- Studies on animals, not on humans<br>- Prospective studies, abstracts, discussions, literature reviews and systematic reviews<br>- Studies which include postherpetic trigeminal neuralgia<br>- Studies which include neuropathic pains, with not mentioned TN                                                                                                                           |
| <b>Information sources</b>         | Electronic databases: PubMed and Cochrane library.<br>Keywords: trigeminal neuralgia, trigeminal nerve, botulinum A toxin, botulinum neurotoxin A.<br>Time period: January 2010 - February 2020.                                                                                                                                                                                                                  |
| <b>Study selection</b>             | Searching by entering the keywords in a few combinations and according to chosen inclusion criteria<br>Screening with exclusion of duplicates<br>Eligibility according to exclusion criteria<br>Including only relevant articles                                                                                                                                                                                  |
| <b>Outcomes and prioritization</b> | Assessing success of BT-A therapy in patients with Trigeminal neuralgia, difference in dosages and side effects.                                                                                                                                                                                                                                                                                                  |

BT-A = botulinum toxin type A; TN = trigeminal neuralgia.
